# Supplementary material for: Dual role of autotaxin as novel biomarker and therapeutic target in pancreatic neuroendocrine neoplasms
Source: PubMed Central journal article supplement — Cancer Sci. 2023 Sep 28;114(12):4571–82. doi: 10.1111/cas.15980 (PMC10728022; doi:10.1111/cas.15980), 2023-09-28
Supplement: CAS-114-4571-s001.pdf [file CAS-114-4571-s001.pdf]

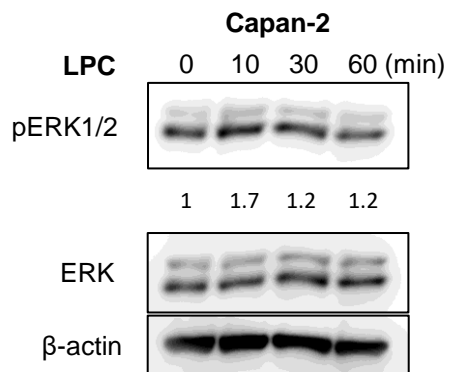

**Supporting Information Figure S2** LPC also promotes signal transduction in Capan-2, which is a cell line of PDAC.
