# Supplementary material for: Dual role of autotaxin as novel biomarker and therapeutic target in pancreatic neuroendocrine neoplasms
Source: PubMed Central journal article supplement — Cancer Sci. 2023 Sep 28;114(12):4571–82. doi: 10.1111/cas.15980 (PMC10728022; doi:10.1111/cas.15980), 2023-09-28
Supplement: CAS-114-4571-s002.pdf [file CAS-114-4571-s002.pdf]

(A)

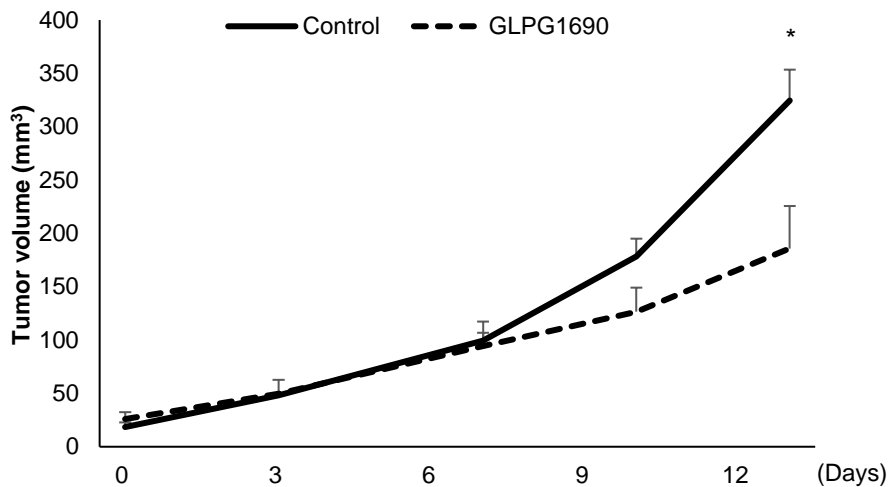

(B)

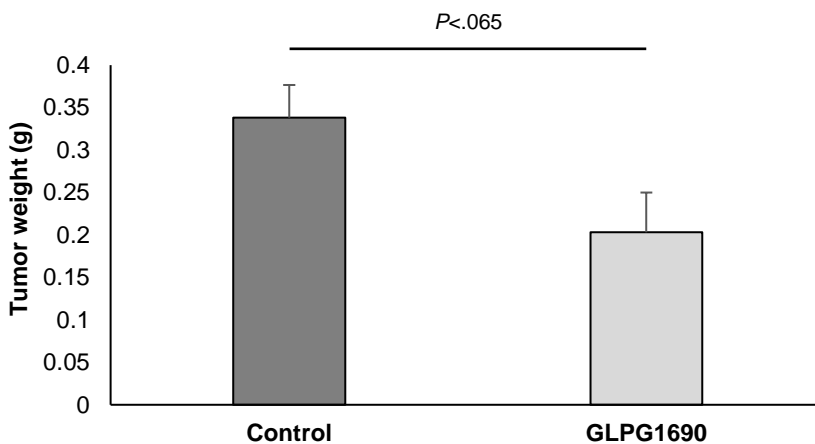

**Supporting Information Figure S3** Blocking ATX attenuates QGP-1 tumor growth. Validation assessment of in vivo experiment using a xenograft model implanted with QGP-1 cells. Quantification of tumor volume (A) and weight (B). Data represent mean values from the control group (n=6) and GLPG1690 group (n=6). Bars, standard error; \* $P < .05$ .
