# Supplementary material for: Dual role of autotaxin as novel biomarker and therapeutic target in pancreatic neuroendocrine neoplasms
Source: PubMed Central journal article supplement — Cancer Sci. 2023 Sep 28;114(12):4571–82. doi: 10.1111/cas.15980 (PMC10728022; doi:10.1111/cas.15980), 2023-09-28
Supplement: CAS-114-4571-s003.pdf [file CAS-114-4571-s003.pdf]

(A)

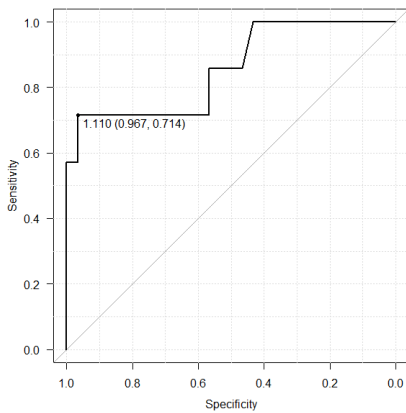

(B)

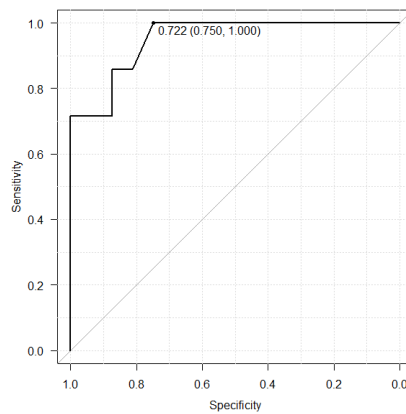

(C)

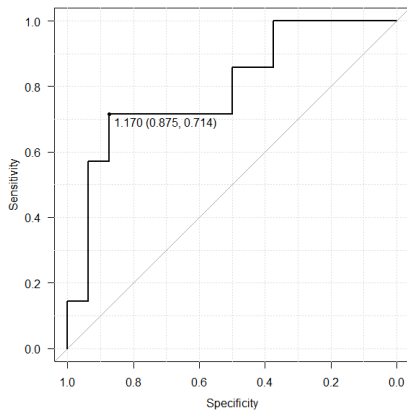

(D)

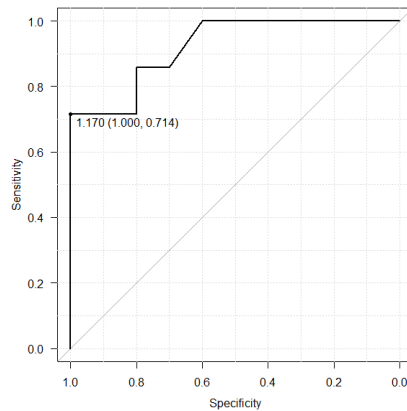

(E)

| Variables                  | AUC   | 95% CI for AUC | Sensitivity | Specificity | Cut-off (mg/L) |
|----------------------------|-------|----------------|-------------|-------------|----------------|
| panNEN and PDAC            |       |                |             |             |                |
| Male                       | 0.855 | 0.670-1.000    | 0.714       | 0.967       | 1.110          |
| Female                     | 0.795 | 0.594-0.995    | 0.714       | 0.875       | 1.170          |
| panNEN and healthy control |       |                |             |             |                |
| Male                       | 0.951 | 0.869-1.000    | 1.000       | 0.750       | 0.722          |
| Female                     | 0.921 | 0.794-1.000    | 0.714       | 1.000       | 1.170          |

**Supporting Information Figure S1** Receiver operating characteristic (ROC) curves in patients with panNEN and PDAC/healthy control.

Ability of serum ATX level to distinguish (A) panNEN and PDAC in male, (B) panNEN and healthy control in male, (C) panNEN and PDAC in female, (D) panNEN and healthy control in female. (E) Diagnostic performance of serum ATX level. ROC analysis was used to determine the area under the ROC curve. CI, confidence interval; PDAC, pancreatic ductal adenocarcinoma
